## Treatment of Pediatric Obesity: A Systematic Review and Meta-Analysis of Randomized Trials

Lauren McGovern, Jonathan N. Johnson, Remberto Paulo, Allison Hettinger, Vibha Singhal, Celia Kamath, Patricia J. Erwin, and Victor M. Montori

Department of Pediatrics (L.M., J.N.J., R.P., A.H., V.S.), Division of Pediatric Endocrinology (R.P.), Knowledge and Encounter Research Unit (C.K., P.J.E., V.M.M.), Division of Endocrinology and Internal Medicine, and Mayo Clinic College of Medicine Libraries (P.J.E.), Mayo Clinic College of Medicine, Rochester, Minnesota 55905

**Context:** The efficacy of treatments for pediatric obesity remains unclear.

**Objective:** We performed a systematic review of randomized trials to estimate the efficacy of nonsurgical interventions for pediatric obesity.

**Data Sources:** Librarian-designed search strategies of nine electronic databases from inception until February 2006, review of reference lists from published reviews, and content expert advice provided potentially eligible studies.

**Study Selection:** Eligible studies were randomized trials of overweight children and adolescents assessing the effect of nonsurgical interventions on obesity outcomes.

**Data Extraction:** Independently and in duplicate, reviewers assessed the quality of each trial and collected data on interventions and outcomes.

**Data Synthesis:** Of 76 eligible trials, 61 had complete data for meta-analysis. Short-term medications were effective, including sibutramine [random-effects pooled estimate of body mass index (BMI) loss of 2.4 kg/m<sup>2</sup> with a 95% confidence interval (CI) of 1.8–3.1; proportion of between-study inconsistency not due to chance ( $I^2$ ) = 30%] and orlistat (BMI loss = 0.7 kg/m<sup>2</sup>; CI = 0.3–1.2;  $I^2$  = 0%). Trials that measured the effect of physical activity on adiposity (*i.e.* percent body fat and fat-free mass) found a moderate treatment effect (effect size =  $-0.52$ ; CI =  $-0.73$  to  $-0.30$ ;  $I^2$  = 0%), whereas trials measuring the effect on BMI found no significant effect (effect size =  $-0.02$ ; CI =  $-0.21$  to 0.18;  $I^2$  = 0%), but reporting bias may explain this finding. Combined lifestyle interventions (24 trials) led to small changes in BMI.

**Conclusions:** Limited evidence supports the short-term efficacy of medications and lifestyle interventions. The long-term efficacy and safety of pediatric obesity treatments remain unclear. (*J Clin Endocrinol Metab* 93: 4600–4605, 2008)

There is an epidemic of childhood obesity that is associated with an increased incidence of cardiovascular risk factors, adult obesity, and obesity-related comorbidities (1). The American Academy of Pediatrics and the Centers for Disease Control use the term overweight to denote excessive body weight and obesity to describe excessive body fat. In 1998, an expert committee established general pediatric treatment guidelines based

on body mass index (BMI), a measure of body weight (2). These guidelines suggested that clinicians advise weight loss in children aged 2–7 yr with BMI above the 95th percentile and complications (mild hypertension, dyslipidemia, and insulin resistance) and weight maintenance to children without any of these complications (2). These guidelines also suggested that clinicians advise weight loss to children 7 yr or older with BMI above the 95th

0021-972X/08/\$15.00/0

Printed in U.S.A.

Copyright © 2008 by The Endocrine Society

doi: 10.1210/jc.2006-2409 Received November 5, 2007. Accepted August 29, 2007.

First Published Online September 9, 2008

Abbreviations: BMI, Body mass index; CI, confidence interval.

percentile and or BMI within the 85–94th percentiles and complications (2). A recently published consensus statement offered similar advice, indicating lifestyle counseling for children with BMI at or above the 85th percentile and specialist care for children with BMI at or above the 95th percentile (3). Authors of these and other efforts to guide clinical practice benefited only marginally, if at all, from rigorous summaries of the best available evidence from clinical care research.

The Endocrine Society decided to formulate clinical practice guidelines for the management of pediatric obesity. In doing so, it formed a Task Force to develop these recommendations. This Task Force asked the Mayo Knowledge and Encounter Research Unit, under contract to perform evidence syntheses with The Endocrine Society, to conduct a systematic review of the literature on the treatment of pediatric obesity. This report briefly summarizes the findings of a systematic review and meta-analyses of randomized trials published in the literature up to February 2006 and reports on the effect of evaluated treatments on obesity outcomes.

## Materials and Methods

The Endocrine Society Pediatric Obesity Task Force commissioned this review, approved the review protocol, offered references, and provided insight into the interpretation of the results. We have produced this report in adherence with the Quality of Reporting of Meta-analyses (QUOROM) standards for reporting systematic reviews of randomized trials (4).

### Clinical question

What is the efficacy of weight loss interventions (diet, physical activity, and pharmacological agents) for overweight children and adolescents?

### Eligibility criteria

Eligible studies were fully published randomized trials (in any language) with the majority of participants being overweight (as defined in each study) children and adolescents (ages 2–18) and assessing the effect of lifestyle and pharmacological interventions on obesity outcomes. Prevention trials were included in the accompanying prevention review (5); that prevention review shares common search and selection processes with this treatment review but no common analyses. Although trials of children and adolescents with insulin resistance and type 2 diabetes were included, we excluded trials of patients with type 1 diabetes or eating disorders (bulimia or anorexia nervosa), Prader-Willi patients, and other patients in which obesity is part of a clinical syndrome and follows different natural and clinical histories.

Eligible lifestyle interventions included any treatment strategy aimed at changing the diet and/or activity level of overweight children. These interventions could target the participant directly or through their family, school, or community. Eligible trials could enroll community agents, school personnel, family members, or healthcare personnel to deliver the interventions.

Eligible pharmacological interventions were medications used with the objective of reducing obesity measures in overweight children. We excluded trials of agents administered with the intent to reduce cardiovascular risk factors in obese children, such as antihypertensive and antihyperlipidemic agents.

Eligible studies assessed an objective mass-based obesity measurement at the end of the study period (regardless of whether authors reported the results of the intervention on this measure). Mass-based out-

comes included BMI (preferred outcome), percent overweight, percent fat-free mass, and visceral adiposity measurements (6). We excluded trials measuring percent weight loss irrespective of height. Outcome effects measured within 6 months of onset of intervention were deemed short term.

### Identification and retrieval

An expert reference librarian (P.J.E.) designed and conducted the electronic search strategy with input from a team of pediatric physicians and researchers. To identify eligible studies, our systematic search included the electronic databases MEDLINE, EMBASE, ERIC, CINAHL, Cochrane Central Register of Controlled Trials (CENTRAL), PSYCIInfo, Dissertation Abstracts International, Science Citation Index, and Social Science Citation Index, in all cases from their inception until February 2006 (detailed search strategies available from the authors). We also reviewed the reference sections of identified reviews and published guidelines. Finally, we received suggestions for inclusion of articles from pediatric obesity experts that comprised The Endocrine Society Pediatric Obesity Task Force.

One team of two reviewers (L.M. and C.C.K.) independently identified for full text retrieval all eligible records from the abstracts and titles; records in which the reviewers disagreed were also retrieved in full text. Teams of two reviewers (L.M., R.P., and A.H.) working independently and in duplicate again reviewed the full text articles for eligibility; an endocrinologist with expertise in research methodology (V.M.M.) not involved in the initial assessment resolved disagreements.

### Data collection

Working in duplicate, six trained reviewers extracted the following data from each eligible article: year and journal of publication, type of study (*e.g.* pilot), level of randomization (*e.g.* community, school, or clinical), participants (age and gender), measure of obesity (BMI, percent overweight, percent fat-free mass, or visceral adiposity), experimental and control interventions (type of intervention, deliverer of intervention, and level and duration of intervention) and results. When authors reported both end-of-study results and change-from-baseline results, we collected end-of-study results assuming that imbalances at baseline between groups were random and would even out as we pooled across trials. When possible, we calculated mean or variance data from related information [*e.g.* reported *t* scores and *P* values, SE, and confidence intervals (CI)] using standard procedures recommended in the Cochrane Reviewers' Handbook version 4.2.5 ([www.Cochrane.org/resources/handbook/](http://www.Cochrane.org/resources/handbook/)).

### Quality assessment

To ascertain the validity of eligible randomized trials, pairs of reviewers working independently and with substantial reliability (corresponding  $\kappa$  where appropriate) determined the extent to which trials reported concealment of allocation ( $\kappa = 0.94$ ), blinding of patients ( $\kappa = 0.94$ ) to the provider of intervention ( $\kappa = 0.94$ ) and data collectors ( $\kappa = 1$ ), blinding to the hypothesis ( $\kappa = 1$ ), level of randomization ( $\kappa = 0.83$ ), and extent of loss to follow-up (*i.e.* the percentage of patients in whom the investigators were not able to ascertain outcomes).

### Author contact

Using up to two electronic mail contacts to the corresponding and/or first author of each eligible article, we sought to confirm our data extraction and quality assessment and to request missing information about trial design and quality, study characteristics, or outcome data. The response rate to our requests was 22%.

### Statistical analysis

#### Meta-analysis

For each analysis, we determined the effect size (standardized mean difference) and 95% CI for the difference between treatment arm and

control arm. The standardized mean difference resulted from dividing the mean difference between arms by the pooled variance between arms with adjustment for small samples (Hedges  $g$ ) as implemented in Revman 4.2 (Cochrane Collaboration). We considered standardized mean differences of about 0.2 or less as small, about 0.5 as moderate, and about 0.8 or greater as large effect sizes. We used random-effects meta-analysis to compare the effects on obesity outcomes of diet alone *vs.* control, exercise alone *vs.* control, pharmacological therapy *vs.* placebo control, and combined lifestyle modifications *vs.* control. We quantified the extent to which the between-study variability observed was due to true between-study differences (rather than to chance) using the  $I^2$  statistic (7). Inconsistency was small when  $I^2$  was less than 25%, moderate 25–50%, and large  $>50\%$ .

### Subgroup analysis

We performed four subgroup analyses. Several narrative reviews reported that delivering combined lifestyle interventions involving parents or the family was a promising approach to treating obesity; hence, we performed a subgroup analysis comparing the effect of this intervention when delivered to the child or the adolescent and compared its effects when it was delivered with some degree of parental participation. We analyzed combined lifestyle interventions delivered to various age-group-specific targets. Also, we hypothesized that physical activity interventions could have a greater effect on percent body fat than on BMI; hence, we performed a subgroup analysis of these trials by outcome. In addition, we sought to determine whether reduced sedentary behavior and increased physical activity had distinct impact on obesity outcomes. Finally, we tested for a subgroup interaction between the choice of outcome measure (change-from-baseline *vs.* end-of-study) and the treatment effect, but these tests were not contributory.

## Results

### Search results

Figure 1 describes the flow of candidate and eligible articles. After searching the electronic databases, we identified 1162 abstracts, of which 263 were deemed relevant by title and abstract

alone. Also, we found an additional 65 articles from review of references from relevant reviews and guidelines and from input from the obesity task force members. After review of 328 full-text articles for treatment and prevention of pediatric obesity, 75 articles were deemed eligible for the review on treatment of pediatric obesity. One additional trial we detected in the U.S. Food and Drug Administration (FDA) website and considered unpublished was indeed published at the time of the final draft of this report and was included (8); in all, 61 trials had complete data to include in meta-analyses.

### Overall methodological quality

Table 1 shows the reported methodological quality of the eligible trials for each of the review questions. Almost all trials across these reviews lacked reporting or conduct of allocation concealment and blinding (except for placebo-controlled drug trials); nearly half of the trials lost 10% or more participants to follow-up (*i.e.* had no outcome data at the end of trial for these randomized participants).

### Meta-analyses

Figure 2 summarizes the results of each of the meta-analyses listed below. The *Appendix* (published as supplemental data on The Endocrine Society's Journals Online web site at <http://jcem.endojournals.org>) includes detailed tables of study characteristics and metaanalytic plots for each of the questions below.

### Pharmacological treatments

This review includes 17 trials of pharmacological interventions (supplemental Table 1); none explicitly required patients to have attempted lifestyle interventions before enrollment. Three trials assessed the effect of sibutramine on adolescents with obe-

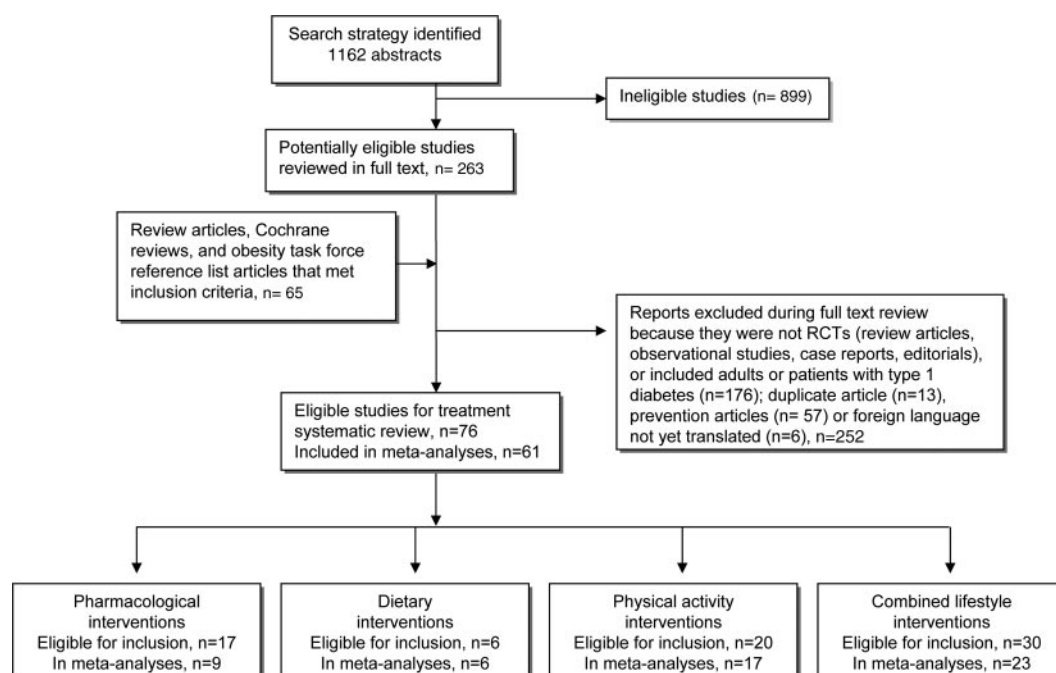

FIG. 1. Quality of Reporting of Meta-Analyses (QUOROM) flow chart of study selection. RCT, Randomized clinical trial.

**TABLE 1.** Summary table of methodological features to prevent bias in eligible trials, by review question

| Review question (no. of trials)          | Allocation concealment |              |    | Blinding              | Loss to follow-up |        |           |
|------------------------------------------|------------------------|--------------|----|-----------------------|-------------------|--------|-----------|
|                                          | Yes                    | Not reported | No |                       | <10%              | 10–20% | ≥20%      |
| Pharmacological interventions (n = 17)   | 1 (6%)                 | 5            | 11 | 16 (94%) <sup>a</sup> | 6                 | 5      | 6 (35%)   |
| Diet interventions (n = 6)               | 0 (0%)                 | 5            | 1  | 0 (0%)                | 2                 | 3      | 1 (16.7%) |
| Physical activity interventions (n = 20) | 0 (0%)                 | 2            | 18 | 0 (0%)                | 10                | 2      | 5 (25%)   |
| Combined lifestyle (n = 30)              | 0 (0%)                 | 1            | 29 | 0 (0%)                | 16                | 7      | 5 (17%)   |

<sup>a</sup> Presumed blind for participants and caregivers (unclear for data collectors) because of use of a placebo control.

sity. The pooled effect size was large ( $-1.01$ ;  $CI = -1.28$  to  $-0.73$ ;  $I^2 = 30\%$ ); this effect is consistent with a loss in BMI of  $2.4 \text{ kg/m}^2$  ( $CI = 1.8\text{--}3.1 \text{ kg/m}^2$ ) after 6 months of use (supplemental Fig. 1). Patients taking sibutramine had higher rates of elevated blood pressure and pulse rate than patients taking placebo.

Three randomized trials of orlistat found a small to moderate effect on obesity outcomes ( $-0.29$ ;  $CI = -0.46$  to  $-0.12$ ;  $I^2 = 0\%$ ); this effect is consistent with a loss in BMI of  $0.7 \text{ kg/m}^2$  ( $CI = 0.3\text{--}1.2 \text{ kg/m}^2$ ) (supplemental Fig. 1) More patients taking orlistat reported gastrointestinal side effects including abdominal discomfort, pain, and steatorrhea than patients on placebo.

Three randomized trials of metformin monotherapy on hyperinsulinemic nondiabetic obese adolescents showed a small nonsignificant change in obesity outcome at 6 months ( $-0.17$ ;  $CI = -0.62$  to  $0.28$ ) (supplemental Fig. 1).

Other trials measured the effect of sympathomimetics (ephedrine and caffeine, dexfenfluramine), dehydroepiandrosterone, and fiber supplements. We found no trials of rimonabant in children or adolescents.

**Lifestyle intervention: dietary interventions only**

There were six eligible trials of dietary interventions alone (supplemental Table 2). These trials evaluated different diets against control: reduced-glycemic-load diet, protein-sparing modified diet, low-carbohydrate diet, high-protein diet, and hypocaloric diet. The pooled effect across all these diets was  $-0.22$  ( $CI = -0.56$  to  $0.11$ ) with small between-study inconsistency ( $I^2 = 22.5\%$ ). Two trials that assessed interventions focused on reducing carbohydrates in the diet estimated nonsignificant large reductions in obesity outcome (9, 10).

**Lifestyle interventions: physical activity interventions only**

Of the 20 eligible physical activity trials (supplemental Table 3), the 17 trials with complete data yielded inconsistent results ( $I^2 = 29\%$ ; supplemental Fig. 2). We explored the extent to which differences in obesity outcome measures could explain the observed inconsistency (*i.e.* measures of adiposity, *i.e.* percent body fat and fat-free mass) could be more sensitive to change associated with physical activity than BMI (6). Indeed, we found

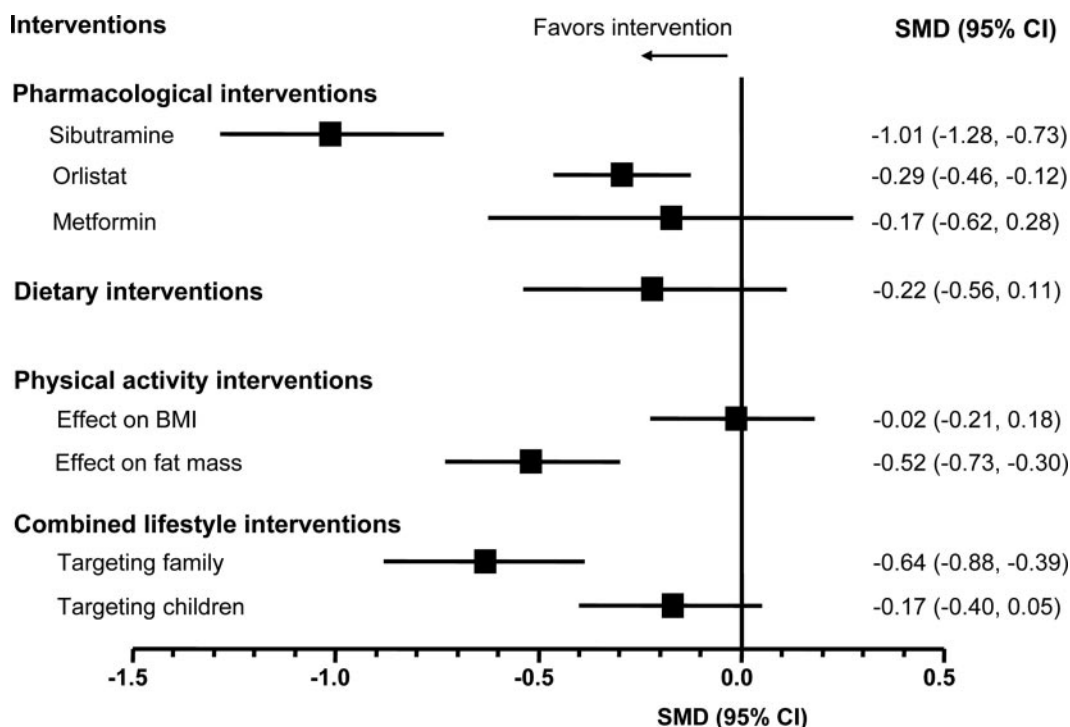

**FIG. 2.** Overall summary of meta-analyses results of randomized trials of treatments for pediatric obesity. Plot shows metaanalytic point estimates (■) and 95% CI (horizontal lines). SMD, Standardized mean differences.

an outcome-treatment interaction ( $P = 0.0007$ ); trials that measured the effect of physical activity on adiposity found a moderate treatment effect ( $-0.52$ ,  $CI = -0.73$  to  $-0.30$ ;  $I^2 = 0\%$ ), and trials measuring the effect on BMI found no significant effect ( $-0.02$ ,  $CI = -0.21$ – $0.18$ ;  $I^2 = 0\%$ ). When we limited the subgroup analysis to the six trials that reported the effect of lifestyle interventions on both outcomes, the interaction was no longer significant ( $P = 0.28$ ), suggesting the initial observation resulted from reporting bias. Four trials evaluated reduced sedentary behavior as the key activity intervention (11, 12). Three of these trials ( $n = 116$ ) reported sufficient data to analyze; the point estimate was consistent with no benefit, but the results were imprecise ( $0.02$ ;  $CI = -0.35$ – $0.39$ ) (11, 13, 14) (supplemental Fig. 3).

### Combination lifestyle interventions (physical activity and dietary modification)

The pooled estimate across 23 trials assessing the efficacy of combination of lifestyle interventions with complete data of the 30 eligible trials (supplemental Table 4) was consistent with a small to moderate treatment effect (supplemental Fig. 4). The largest effects were associated with parental involvement in delivering the intervention, when the parents were either targeted individually or with the child. We did not find a significant interaction between age of participants and the effect of lifestyle interventions with parental involvement, but there was a trend toward a larger treatment effect in children aged 8 yr or less ( $-0.70$ ;  $CI = -1.00$  to  $-0.40$ ) (supplemental Fig. 5).

## Discussion

In this systematic review and meta-analyses of available randomized trials of treatments for childhood obesity, we found evidence of 1) short-term efficacy of pharmacological interventions (sibutramine and orlistat in adolescents) on BMI, 2) moderate treatment effect of physical activity on adiposity but not on BMI, and 3) small to moderate treatment effect of combined lifestyle interventions on BMI. Nonsignificant trends favored delivering combined lifestyle interventions with parental involvement, particularly to children 8 yr old or younger (15–17). Our review provides no data to directly compare the relative efficacy of pharmacological agents with each other, with lifestyle interventions, or with bariatric surgery.

### Limitations and strengths

Our systematic review has some limitations. Of the 76 final articles that met inclusion criteria, 61 had complete data and were included in the analysis. This likely represents a high probability of reporting bias. Despite our best efforts, we may have missed eligible studies that could contribute to publication bias, *i.e.* overestimating the treatment effect.

Overall, included trials have limited methodological features that protect their results from bias and therefore can only yield weak inferences. Pooling across trials with a high degree of clinical or statistical inconsistency increases the risk of spuriously precise estimates with limited clinical sense; the limited duration

of the included trials weakens inferences about the long-term effect of the studied interventions.

Transparent reporting of the included trials, efforts to limit selection bias and reporting bias (including extensive author contact), attention to quality of methods, and focused and parsimonious analyses (including selected subgroup analyses) strengthen the inferences from this review. Our report should help readers discern the extent to which the design and methods of the eligible trials are consistent with the pooled estimates. We put forth pooled estimates because we think they are helpful in summarizing the available evidence.

### Comparison with other reviews

Although our review includes 42 more trials and is current as of February 2006, our inferences are not very different from those drawn from a Cochrane review in 2003. In it, Summerbell and colleagues (1) concluded that most studies were too small to detect treatment effects, and outcomes measured were inconsistent across studies. We have extended the latter inference to note that perhaps measures of fat distribution are more sensitive to change than BMI. Our results are also consistent with another review that found short-term pharmacological therapy beneficial in obese adolescents (20).

The effects of parental involvement in treatment of childhood obesity remain unclear but widely advocated (21) particularly for younger patients (22, 23). Our review weakly suggests that parental involvement among children and adolescent had a small treatment effect with a trend toward a larger effect among patients 8 yr old or younger.

### Implications for practice, research, and policy

The available evidence should inform the practice of evidence-based obesity treatment in children. This systematic evidence summary helped guideline developers with the Task Force on Pediatric Obesity of the Endocrine Society to consider the quality of evidence and grade of recommendation for each of the treatment guidelines. Those guidelines reflect the clinical implications of our findings.

There are some research implications of this review. Although in adults, adverse health outcomes linked to obesity appear related to excessive body fat and distribution, there is no simple, reproducible, accurate, and cost-effective method to measure fat mass in children. BMI is currently the standard of following obesity status in children as recommended by the American Academy of Pediatrics (12). However, BMI does not completely inform health risks in children (3), requires accuracy and reproducibility in the measure of both height and weight, misinterprets risk in muscular and short children, and may be less responsive to change. Although potentially more responsive to health interventions, the strength and shape of the association (*e.g.* J-curve and threshold) between measures of body fat and metabolic and cardiovascular outcomes related to obesity remain largely unknown (22, 23). Hence, trialists should consider choosing to assess the effect of interventions on responsive outcomes either by choosing those outcomes (such as fat-free mass or percent body fat) or by testing the effect on less responsive

outcomes (like BMI) of more powerful interventions over a longer period of time.

Numerous factors contribute to obesity, including but not limited to genetics, environment, metabolic, biochemical, psychological, and physiological (12). These complex causal links make it unlikely that a single silver-bullet intervention will be successful for all obese patients. This would suggest a careful multidisciplinary and multimodality approach. The accompanying Endocrine Society practice guidelines offer such an approach: an evaluation and treatment algorithm for pediatric obesity. Long-term randomized trials of this and other comprehensive multimodality algorithms offer the opportunity to ascertain the extent to which a comprehensive approach is effective, safe, and feasible in reducing the burden of obesity and its complications among children and adolescents at greatest risk of weight-related morbidity. Promising interventions for high-risk individuals, such as bariatric surgery and novel pharmacological agents, also require rigorous assessment with attention to long-term patient important outcomes.

In conclusion, limited evidence supports the short-term efficacy of selected pharmacological monotherapy, increased physical activity, and combined lifestyle interventions. The long-term impact of obesity treatments on the health of children and adolescents remains unclear.

## Acknowledgments

Address all correspondence and requests for reprints to: Victor M. Montori, M.D., M.Sc., Mayo Clinic, W18A, 200 First Street SW, Rochester, Minnesota 55905. E-mail: montori.victor@mayo.edu.

This work was supported by a contract from The Endocrine Society. Disclosure Statement: The authors have nothing to disclose.

## References

1. Summerbell CD, Ashton V, Campbell KJ, Edmunds L, Kelly S, Waters E 2003 Interventions for treating obesity in children. *Cochrane Database Syst Rev* 2003:CD001872
2. Barlow SE, Dietz W 1998 Obesity evaluation and treatment: Expert Committee recommendations. The Maternal and Child Health Bureau, Health Resources and Services Administration and the Department of Health and Human Services. *Pediatrics* 102:E29
3. Speiser PW, Rudolf MC, Anhalt H, Camacho-Hubner C, Chiarelli F, Eliakim A, Freemark M, Gruters A, HersHKovitz E, Iughetti L, Krude H, Latzer Y, Lustig RH, Pescovitz OH, Pinhas-Hamiel O, Rogol AD, Shalitin S, Sultan C, Stein D, Vardi P, Werther GA, Zadik Z, Zuckerman-Levin N, Hochberg Z, Obesity Consensus Working Group 2005 Childhood obesity. *J Clin Endocrinol Metab* 90:1871–1887
4. Moher D, Cook DJ, Eastwood S, Olkin I, Rennie D, Stroup DF 1999 Improving the quality of reports of meta-analyses of randomised controlled trials: the QUOROM statement. Quality of Reporting of Meta-analyses. *Lancet* 354: 1896–1900
5. Kamath CC, Vickers KS, Ehrlich A, McGovern L, Johnson J, Singhal V, Paulo R, Hettinger A, Erwin PJ, Montori VM 2008 Behavioral interventions to prevent childhood obesity: a systematic review and meta-analyses of randomized trials *J Clin Endocrinol Metab* 93:4606–4615
6. Freedman DS, Wang J, Maynard LM, Thornton JC, Mei Z, Pierson RN, Dietz WH, Horlick M 2005 Relation of BMI to fat and fat-free mass among children and adolescents. *Int J Obes (Lond)* 29:1–8
7. Higgins JP, Thompson SG 2002 Quantifying heterogeneity in a meta-analysis. *Stat Med* 21:1539–1558
8. Berkowitz RI, Fujioka K, Daniels SR, Hoppin AG, Owen S, Perry AC, Sothorn MS, Renz CL, Pirner MA, Walch JK, Jasinsky O, Hewkin AC, Blakesley VA 2006 Effects of sibutramine treatment in obese adolescents: a randomized trial. *Ann Intern Med* 145:81–90
9. Ebbeling CB, Leidig MM, Sinclair KB, Hangen JP, Ludwig DS 2003 A reduced-glycemic load diet in the treatment of adolescent obesity. *Arch Pediatr Adolesc Med* 157:773–779
10. Sondike SB, Copperman N, Jacobson MS 2003 Effects of a low-carbohydrate diet on weight loss and cardiovascular risk factor in overweight adolescents. *J Pediatr* 142:253–258
11. Epstein LH, Paluch RA, Gordy CC, Dorn J 2000 Decreasing sedentary behaviors in treating pediatric obesity. *Arch Pediatr Adolesc Med* 154:220–226
12. Epstein LH, Valoski AM, Vara LS, McCurley J, Wisniewski L, Kalarchian MA, Klein KR, Shrager LR 1995 Effects of decreasing sedentary behavior and increasing activity on weight change in obese children. *Health Psychol* 14:109–108
13. Epstein LH, Paluch RA, Kilanowski CK, Raynor HA 2004 The effect of reinforcement or stimulus control to reduce sedentary behavior in the treatment of pediatric obesity. *Health Psychol* 23:371–380
14. Faith MS, Berman N, Heo M, Pietrobelli A, Gallagher D, Epstein LH, Eiden MT, Allison DB 2001 Effects of contingent television on physical activity and television viewing in obese children. *Pediatrics* 107:1043–1048
15. Israel AC, Guile CA, Baker JE, Silverman WK 1994 An evaluation of enhanced self-regulation training in the treatment of childhood obesity. *J Pediatr Psychol* 19:737–749
16. Brownell KD, Kelman JH, Stunkard AJ 1983 Treatment of obese children with and without their mothers: changes in weight and blood pressure. *Pediatrics* 71:515–523
17. Chanoine JP, Hampl S, Jensen C, Boldrin M, Hauptman J 2005 Effect of orlistat on weight and body composition in obese adolescents: a randomized controlled trial. *JAMA* 293:2873–2883
18. Jain A 2004 What works for obesity? A summary of the research behind obesity interventions. In: Hilton J, ed. *Clinical evidence*. London: BMJ Publishing Group; 2–62
19. Epstein LH, Myers MD, Raynor HA, Saelens BE 1998 Treatment of pediatric obesity. *Pediatrics* 101:554–570
20. Glenny AM, O'Meara S, Melville A, Sheldon TA, Wilson C 1997 The treatment and prevention of obesity: a systematic review of the literature. *Int J Obes* 21:715–737
21. McLean N, Griffin S, Toney K, Hardeman W 2003 Family involvement in weight control, weight maintenance and weight-loss interventions: a systematic review of randomised trials. *Int J Obes Relat Metab Disord* 27:987–1005
22. Mitchell BM, Gutin B, Kapuku G, Barbeau P, Humphries MC, Owens S, Vemulapalli S, Allison J 2002 Left ventricular structure and function in obese adolescents: relations to cardiovascular fitness, percent body fat, and visceral adiposity, and effects of physical training. *Pediatrics* 109:E73
23. Owens S, Gutin B, Allison J, Riggs S, Ferguson M, Litaker M, Thompson W 1999 Effect of physical training on total and visceral fat in obese children. *Med Sci Sports Exerc* 31:143–148
